# A Bayesian Approach for Estimating Branch-Specific Speciation and Extinction Rates

R.H. Lineage-Heterogeneous Birth-Death-Shift Process

SEBASTIAN HÖHNA<sup>1,2</sup>, WILLIAM A. FREYMAN<sup>3</sup>, ZACHARY NOLEN<sup>2</sup>, JOHN P. HUELSENBECK<sup>4</sup>,  
MICHAEL R. MAY<sup>5</sup>, AND BRIAN R. MOORE<sup>5</sup>

<sup>1</sup>*GeoBio-Center, Ludwig-Maximilians-Universität München  
Richard-Wagner Straße 10, 80333 Munich, Germany*

<sup>2</sup>*Division of Evolutionary Biology, Ludwig-Maximilians-Universität München  
Grosshaderner Straße 2, Planegg-Martinsried 82152, Germany*

<sup>3</sup>*Department of Ecology, Evolution, and Behavior, University of Minnesota, Twin Cities  
1479 Gortner Avenue, Saint Paul, MN 55108, U.S.A.*

<sup>4</sup>*Department of Integrative Biology, University of California, Berkeley  
3060 VLSB #3140, Berkeley, CA 94720-3140, U.S.A.*

<sup>5</sup>*Department of Evolution and Ecology, University of California, Davis  
Storer Hall, One Shields Avenue, Davis, CA 95616, U.S.A.*

To whom correspondence should be addressed:

Sebastian Höhna  
GeoBio-Center  
Department of Earth and Environmental Science  
Palaeontology & Geobiology  
Ludwig-Maximilians-Universität München  
Richard-Wagner-Straße 10  
80333 München  
Germany

Phone: +49 (0)89 / 2180-6615  
E-mail: [sebastian.hoehna@gmail.com](mailto:sebastian.hoehna@gmail.com)

1 *Abstract*— Species richness varies considerably among the tree of life which can only be explained by het-  
2 erogeneous rates of diversification (speciation and extinction). Previous approaches use phylogenetic trees to  
3 estimate branch-specific diversification rates. However, all previous approaches disregard diversification-rate  
4 shifts on extinct lineages although 99% of species that ever existed are now extinct. Here we describe a  
5 lineage-specific birth-death-shift process where lineages, both extant and extinct, may have heterogeneous  
6 rates of diversification. To facilitate probability computation we discretize the base distribution on speci-  
7 ation and extinction rates into  $k$  rate categories. The fixed number of rate categories allows us to extend  
8 the theory of state-dependent speciation and extinction models (*e.g.*, BiSSE and MuSSE) to compute the  
9 probability of an observed phylogeny given the set of speciation and extinction rates. To estimate branch-  
10 specific diversification rates, we develop two independent and theoretically equivalent approaches: numerical  
11 integration with stochastic character mapping and data-augmentation with reversible-jump Markov chain  
12 Monte Carlo sampling. We validate the implementation of the two approaches in **RevBayes** using simulated  
13 data and an empirical example study of primates. In the empirical example, we show that estimates of the  
14 number of diversification-rate shifts are, unsurprisingly, very sensitive to the choice of prior distribution.  
15 Instead, branch-specific diversification rate estimates are less sensitive to the assumed prior distribution on  
16 the number of diversification-rate shifts and consistently infer an increased rate of diversification for Old  
17 World Monkeys. Additionally, we observe that as few as 10 diversification-rate categories are sufficient  
18 to approximate a continuous base distribution on diversification rates. In conclusion, our implementation  
19 of the lineage-specific birth-death-shift model in **RevBayes** provides biologists with a method to estimate  
20 branch-specific diversification rates under a mathematically consistent model.

21 [Birth-Death Process; Lineage-Diversification Rates; Phylogeny; **RevBayes**.]

22

*An inordinate fondness for beetles*

23

— *J.B.S. Haldane, in Hutchinson (1959)*

24

## INTRODUCTION

25 Multiple lines of evidence unambiguously demonstrate that rates of diversification change over time and  
26 among lineages. The fossil record, for one, shows a pattern in which some groups flourish for a time, only  
27 to go extinct. Such a pattern cannot be explained by a constant-rate speciation and extinction model of  
28 cladogenesis (birth-death process). Once a group becomes reasonably speciose, it becomes almost impossible  
29 for it to die off unless the relative rates of speciation and extinction change. And, of course, the fossil record  
30 shows periods of time in which the rate of extinction dramatically increases for all lineages of the tree of life.  
31 But even without a fossil record, we would know that speciation and extinction rates have varied across the  
32 branches of the tree of life because the pattern of species richness in different groups differs so dramatically.  
33 How can the exceptional diversity of groups such as beetles or cichlids be explained except by an increased  
34 rate of diversification in those groups?

35 Increasingly, questions regarding diversification-rate variation are pursued by inferring the parameters  
36 of explicit birth-death process models from phylogenies. For example, recent theoretical work has provided  
37 formal statistical phylogenetic methods that allow us to detect tree-wide changes in diversification rate,  
38 where the rates of all contemporaneous lineages vary either in a continuous manner (*e.g.*, Morlon et al.  
39 2011; Etienne and Haegeman 2012; Condamine et al. 2013; Morlon 2014; Höhna 2014; Condamine et al.  
40 2018), or in an episodic manner (*e.g.*, Stadler 2011), including episodes of mass extinction (*e.g.*, Höhna  
41 2015; May et al. 2016). Similarly, formal statistical methods have been developed that allow us to infer  
42 state-dependent variation in diversification rates, where rates of lineage diversification are correlated with  
43 the state of a discrete character (*e.g.*, Maddison et al. 2007; FitzJohn 2012; Magnuson-Ford and Otto 2012;  
44 Beaulieu and O’Meara 2016; Freyman and Höhna 2018), or the value of a continuous trait (FitzJohn 2010).

45 In contrast to the methodological progress for studying tree-wide and state-dependent rate variation,  
46 efforts to develop methods for detecting variation in diversification rates across lineages have proven far  
47 more challenging. Rather than attempting to explicitly model shifts in diversification rates, early approaches  
48 for detecting among-lineage diversification-rate variation were based on summary statistics (Moore et al.  
49 2004; Chan and Moore 2005) that do not provide estimates of branch-specific diversification rates. More  
50 recent approaches are motivated by birth-death processes using phylogenies (*e.g.*, MEDUSA by Alfaro et al.  
51 (2009) and BAMM by Rabosky (2014)) but contain mathematical errors (*i.e.*, the likelihood functions are  
52 incorrect). The reliability and robustness for parameter estimation of these methods is hotly debated (May  
53 and Moore 2016; Moore et al. 2016; Rabosky et al. 2017; Meyer and Wiens 2018; Meyer et al. 2018; Rabosky  
54 2018; Barido-Sottani et al. 2018). The key problem is that none of the existing methods (Rabosky 2014;  
55 Barido-Sottani et al. 2018) take diversification-rate changes on extinct lineages into account. The omission

56 of diversification-rate changes on extinct lineages is biologically problematic because: (a) extant species  
57 affected by a diversification-rate change might go extinct in the future and hence the diversification-rate  
58 change on a currently extant lineage might be a diversification-rate change on an extinct lineage in the  
59 future; and (b) the majority of species that ever existed (approximately 99%) has gone extinct which means  
60 that more diversification-rate changes must have occurred on extinct lineages. Even if we do not consider  
61 extinct lineages in our phylogenies, it is still crucial to model diversification-rate changes on extinct lineages  
62 because the probability of extinction fundamentally depends on the (changing) diversification rates in our  
63 models (Kendall 1948; Nee et al. 1994b,a).

64 Here, we develop a new Bayesian approach for inferring branch-specific rates of speciation and extinction.  
65 To this end, we first introduce the lineage-specific birth-death-shift process; a model that allows diversifi-  
66 cation rates to vary across the lineages of a phylogeny. Importantly, our lineage-specific birth-death-shift  
67 model rectifies the omission of diversification-rate changes on extinct lineages. We then extend previous  
68 theoretical work on inferring state-dependent diversification-rate variation to develop a numerical algorithm  
69 for computing the probability of the tree. We develop two theoretically equivalent approaches for estimating  
70 branch-specific rates of speciation and extinction; the first approach uses numerical integration together with  
71 stochastic character mapping and the second approach uses data augmentation together with reversible-jump  
72 Markov chain Monte Carlo sampling. All previous methods rely only on a data-augmentation approach which  
73 we show is less efficient. More importantly, we can validate our implementation and the underlying theory  
74 by demonstrating that estimates under the two equivalent approaches are, in fact, identical. Furthermore,  
75 we perform a simple simulation study which shows that our implementation behaves as one expects from  
76 Bayesian statistical theory. Finally, we explore the behavior of our method using an empirical example  
77 analysis of primates. All of the methods described in this paper have been implemented in the Bayesian  
78 phylogenetic inference software package `RevBayes` (Höhna et al. 2016).

## 79 METHODS

### 80 *The Lineage-Specific Birth-Death-Shift Process*

81 We define a stochastic process that generates phylogenies via three events: (1) speciation events; (2) extinc-  
82 tion events, and; (3) diversification-rate shift events. These events occur with rates  $\lambda_i$ ,  $\mu_i$  and  $\eta$  respectively,  
83 where the index  $i$  stands for the  $i$ -th species. When a speciation event occurs, a lineage gives rise to two  
84 daughter lineages that inherit the speciation and extinction rates of their parent lineage. When an extinction  
85 event occurs, the lineage is simply terminated. When a diversification-rate shift occurs, new speciation and  
86 extinction rates are drawn from the corresponding base probability distributions,  $f_\lambda(\cdot)$  and  $f_\mu(\cdot)$ , and the  
87 lineage continues to diversify under these new rates. This defines a stochastic branching process in which  
88 rates of diversification are allowed to vary across lineages. We refer to this stochastic branching process as  
89 the lineage-specific birth-death-shift process.

90 Next, we explain how to simulate under the lineage-specific birth-death-shift process. This explanation

91 has two purposes: (a) to clarify how the process works, and (b) to show that one can obtain realizations  
92 under the process which is sufficient to show that the process is in itself coherent. We imagine maintaining  
93 a list of ‘active’ lineages in computer memory. Under this stochastic branching process, the  $i$ -th active  
94 lineage can either speciate (with rate  $\lambda_i$ ) or go extinct (with rate  $\mu_i$ ), and all active lineages can experience  
95 a diversification-rate shift (with a common rate  $\eta$ ). We simulate the process over an interval,  $T$ , starting  
96 with one active lineage at time  $t = T$  in the past. The waiting times between events are exponentially  
97 distributed (because the probability of an event happening at a given time is equal if the rates are equal).  
98 Thus, we simulate forward in time by drawing an exponentially distributed waiting time for each active  
99 lineage. The parameter of the exponential distribution is the sum of the three event rates,  $(\lambda_i + \mu_i + \eta)$ . We  
100 pick the lineage with the shortest waiting time for the next event. We randomly choose the type of event for  
101 this lineage, which will be a speciation event with probability  $\lambda_i/(\lambda_i + \mu_i + \eta)$ , or an extinction event with  
102 probability  $\mu_i/(\lambda_i + \mu_i + \eta)$ , or a diversification-rate shift event with probability  $\eta/(\lambda_i + \mu_i + \eta)$ .

103 When a lineage speciates, it is removed from the active list and replaced with its two daughter lineages,  
104 where each daughter lineage inherits the same speciation and extinction rates of their parent lineage. When  
105 a lineage experiences extinction, it is simply removed from the list of active lineages. When a diversification-  
106 rate shift occurs, the new speciation and extinction rates are drawn from the corresponding base probability  
107 distributions,  $f_\lambda(\cdot)$  and  $f_\mu(\cdot)$ , such that diversification rates are lineage specific. The simulation continues  
108 until the next event occurs after the present (*i.e.*,  $t \leq 0$ ), or until all lineages have gone extinct before time  
109  $t = 0$ .

### 110 *Computing the Probability of an Observed Tree Under the Lineage-Specific* 111 *Birth-Death-Shift Model*

112 In outline, our method to compute the probability of an “observed” tree under the lineage-specific birth-  
113 death-shift model involves two components: (1) discretization of the speciation- and extinction-rate base  
114 probability distributions into  $k$  categories, to approximate the underlying continuous distributions; (2) a  
115 backwards algorithm that traverses the tree from the tips to the root in small time steps,  $\Delta t$ . In each  
116 interval, we solve a pair of ordinary differential equations (ODEs) that compute the change in probability  
117 associated with all of the possible events (speciation, extinction, and diversification-rate shifts among the  $k$   
118 diversification-rate categories) that could occur within each interval. Upon reaching the root, this algorithm  
119 has computed the probability of realizing the observed tree under each of the  $k$  discrete rate categories.  
120 Below, we detail each of these two components.

121 *Discretization of the diversification-rate distributions*— The probability calculations for the lineage-specific  
122 birth-death-shift model are impractical if we have to integrate over continuous base distributions for the  
123 diversification-rate parameters. Accordingly, we adopt an approach that provides an approximation of these  
124 integrals. Under this approach, we first divide the continuous probability distributions for the diversification-  
125 rate parameters into a finite number of  $k$  bins. The width of each bin (or diversification-rate category) is

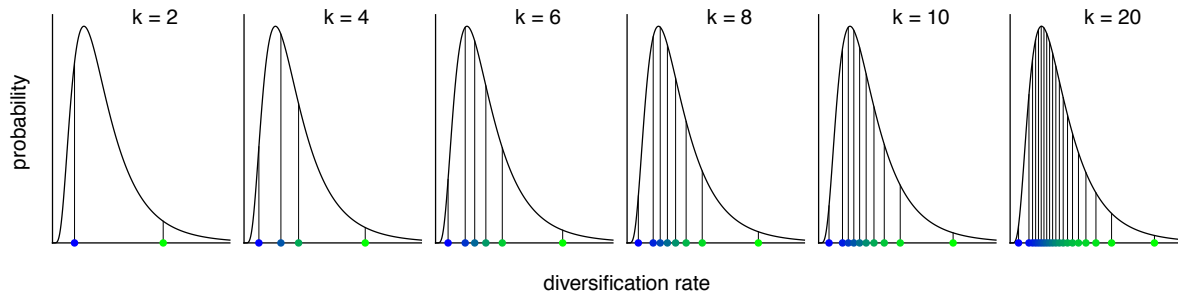

**Figure 1: Approximation of the continuous base distributions for the diversification-rate parameters using discrete rate categories.** Our approach for computing the probability of the data under the lineage-specific birth-death-shift model specifies  $k$  quantiles of the continuous base distributions for the speciation and extinction rates. We compute probabilities by marginalizing (averaging) over the  $k$  discrete rate categories, where the diversification rate for a given category is the median of the corresponding quantile (colored dots). This approach provides an efficient alternative to computing the continuous integral, and will provide a reliable approximation of the continuous integral when the number of categories  $k$  is sufficiently large to resemble the underlying continuous distribution.

126 defined such that each category contains equal probability (*i.e.*, using the  $k$  quantiles of the underlying  
127 continuous probability distribution). Thus, the diversification rate for  $i$ -th discrete category is the median  
128 value of the corresponding quantile. As detailed in the following sections, our probability calculations involve  
129 summing over these  $k$  discrete diversification-rate categories.

130 As in the case of the discrete-gamma model for accommodating among-site variation in substitution  
131 rates (Yang 1994), the number of categories,  $k$ , is not a parameter of our model (*i.e.*, it is an assumption  
132 of the analysis rather than an estimate from the data). The choice of  $k$  categories represents a compromise:  
133 the resemblance to the underlying continuous probability distribution improves as the number of discrete  
134 categories increases (Figure 1). However, the computational burden also scales with the number of discrete  
135 categories. Thus, the value of  $k$  is only of interest to the extent that it must be sufficiently large to avoid  
136 discretization bias, while remaining small enough to allow practical computation. We will explore the impact  
137 of different numbers of diversification-rate categories in a later section.

138 *Backwards algorithm to compute the probability of the observed phylogeny*— The second part of our approach  
139 involves discretizing the tree into tiny time steps, and then numerically integrating over these time slices  
140 to compute the probability of the observed data under the lineage-specific birth-death-shift process. This  
141 aspect of our approach draws heavily on the algorithm developed by Maddison et al. (2007) and FitzJohn  
142 (2012) in the context of exploring a state-dependent birth-death process (their BiSSE and MuSSE model).  
143 Following Maddison et al. (2007), our numerical algorithm begins at the tips of the tree where  $t = 0$  (*i.e.*,  
144 the present). We need to consider two probability terms at each point in time:  $D(t)$  and  $E(t)$ .  $D(t)$  is the  
145 probability of the observed lineage between time  $t$  and the present, and  $E(t)$  is the probability that a lineage  
146 at time  $t$  goes extinct before the present. For each tip, we must initialize  $D(t)$  and  $E(t)$  and also consider the  
147 state of the process. Under the BiSSE model, the diversification process depends on the state of the binary  
148 character (0 or 1). Thus, for a species with the observed state 0, we initialize  $D_0(0) = 1$  and  $D_1(0) = 0$ .  
149 Conversely, for a species with the observed state 1, we initialize  $D_0(0) = 0$  and  $D_1(0) = 1$ . Under our model,

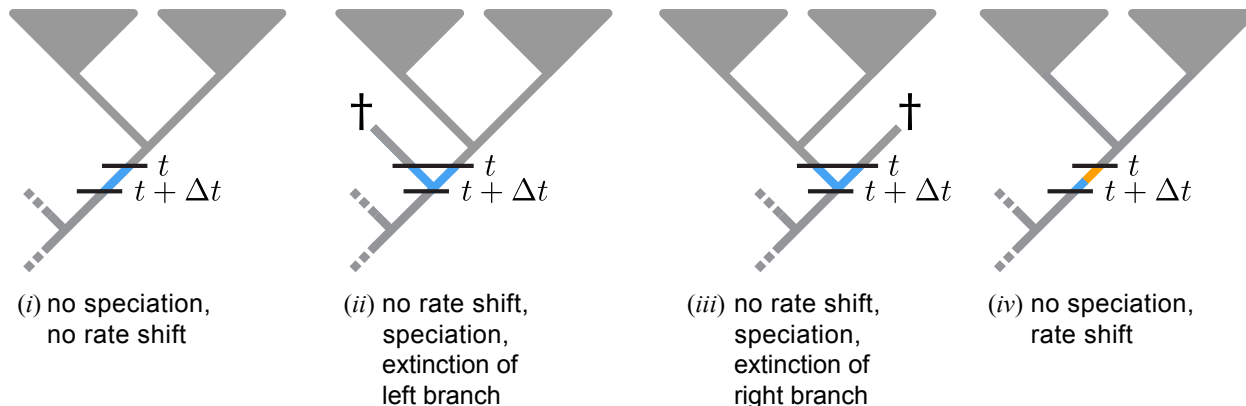

**Figure 2: Possible scenarios that could occur over the interval  $\Delta t$  along a lineage that is observed at time  $t$ .** To compute the probability under the lineage-specific birth-death-shift process, we traverse the tree from the tips to the root in small time steps,  $\Delta t$ . For each step into the past, from time  $t$  to time  $(t + \Delta t)$ , we compute the change in probability of the observed lineage by enumerating all of the possible scenarios that could occur over the interval  $\Delta t$ : (i) nothing happens, (ii) a speciation event occurs, where the right descendant survives and the left descendant goes extinct before the present, or (iii) a speciation event occurs, where the left descendant survives but the right goes extinct before the present, or (iv) a diversification-rate shift from category  $i$  to  $j$  occurs. Color key: segment(s) of the tree within the interval  $\Delta t$  are colored blue for state  $i$  and/or orange for state  $j$  to reflect the conditioning of the corresponding scenarios, segment(s) of the tree between  $t$  and the present are colored gray because we have integrated over the  $k$  discrete rate categories (no specific assignment of rate categories), and segments of the tree between  $t + \Delta t$  and the root are colored gray because we will integrate over the  $k$  discrete rate categories.

150 the state of the diversification process is not observed. Thus, for each species at time  $t = 0$ , we initialize  
 151  $D_i(0) = 1$  for each of the  $i \in (1, \dots, k)$  discrete diversification-rate categories. In fact, this is equivalent to  
 152 the case under the BiSSE model when the state of a given species is unknown (*i.e.*, coded as ‘?’), in which  
 153 case we would initialize  $D_0(0) = 1$  and  $D_1(0) = 1$ . Finally, we initialize the extinction probability for each  
 154 species as  $E_i(0) = 0$  for each of the  $i \in (1, \dots, k)$  discrete diversification-rate categories. Note that if we have  
 155 an incomplete (but random/uniform) sample of species, then we would initialize  $D_i(0) = \rho$  and  $E_i(0) = 1 - \rho$   
 156 for each of the  $i \in (1, \dots, k)$ , where  $\rho$  is the proportion of randomly sampled species (FitzJohn et al. 2009).

157 Next, we begin our traversal of the tree from each tip (where  $t = 0$ ) to the root in tiny time steps,  $\Delta t$ . For  
 158 each time step into the past, we calculate the change in probability of the observed lineage over the interval  
 159  $(t + \Delta t)$  by enumerating all of the events that could occur within the interval  $\Delta t$ . If we assume that  $\Delta t$  is  
 160 small, then the probability of any two events occurring in the same interval is negligible. In the interval  $\Delta t$   
 161 there are four possible scenarios that could occur (see Equation 1 and Figure 2): (i) nothing happens (no  
 162 speciation event or diversification-rate shift), or (ii) no diversification-rate shift but a speciation event occurs  
 163 and the left descendant subsequently goes extinct before the present, or (iii) no diversification-rate shift but  
 164 a speciation event occurs and the right descendant subsequently goes extinct before the present, or (iv) no  
 165 speciation event occurs but there is a diversification-rate shift to any of the other  $(k - 1)$  rate categories. Now

166 we can compute  $D_i(t+\Delta t)$  by writing the set of  $k$  difference equations  $D_1(t+\Delta t), D_2(t+\Delta t), \dots, D_k(t+\Delta t)$ :

$$D_i(t+\Delta t) = \begin{aligned} & (1 - \mu_i \Delta t) \times && \text{In all cases, the lineage survives over the interval, and} \\ & \left[ \begin{aligned} & (1 - \lambda_i \Delta t) \times (1 - \eta \Delta t) D_i(t) && \text{(i) nothing happens,} \\ & + (1 - \eta \Delta t) \lambda_i \Delta t D_i(t) E_i(t) && \text{or (ii) no rate shift, speciation, left extinction,} \\ & + (1 - \eta \Delta t) \lambda_i \Delta t D_i(t) E_i(t) && \text{or (iii) no rate shift, speciation, right extinction,} \\ & + (1 - \lambda_i \Delta t) \sum_{j \neq i}^k \frac{\eta \Delta t}{k-1} D_j(t) \end{aligned} \right] && \text{or (iv) no speciation, but shift to rate } j. \end{aligned} \tag{1}$$

167 Note that the first (unnumbered) term in Equation 1 represents the probability that the observed lineage  
 168 does not go extinct in the interval  $\Delta t$ . The probability of no extinction in the interval  $\Delta t$  is included because  
 169 if the lineage had gone extinct in this interval, then we could not have observed it.

170 Equation 1 makes it clear that in order to compute  $D_i(t)$ , we must simultaneously compute  $E_i(t)$  (the  
 171 probability of a lineage going extinct before the present). Again, we calculate the change in the extinction  
 172 probability for each step into the past, from  $t$  to  $(t+\Delta t)$ , by enumerating all of the scenarios that could  
 173 occur within the interval  $\Delta t$  (see Equation 2 and Figure 3): (i) in the first scenario, the lineage goes extinct  
 174 in the interval,  $\Delta t$ ; in the remaining scenarios, the lineage does not go extinct in the interval, and (ii)  
 175 the lineage does not speciate and does not experience a diversification-rate shift during the interval  $\Delta t$ , but  
 176 subsequently goes extinct before the present, which occurs with probability  $E_i(t)$ , or (iii) the lineage speciates  
 177 in the interval,  $\Delta t$ , such that both descendent lineages must eventually go extinct before the present, which  
 178 occurs with probability  $E_i(t)^2$ , or (iv) the lineage does not speciate in the interval,  $\Delta t$ , but does experience

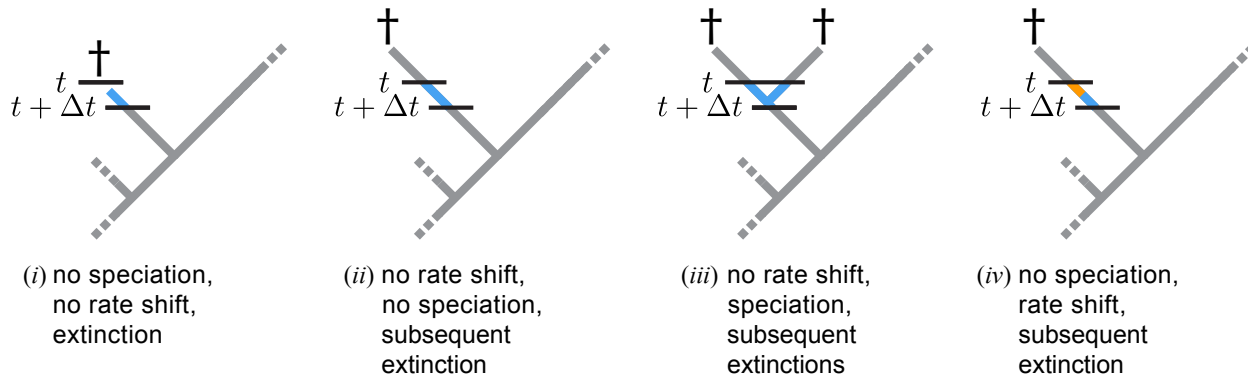

**Figure 3: Possible extinction scenarios.** For each step into the past, from time  $t$  to time  $(t+\Delta t)$ , we compute the change in the extinction probability,  $E_i(t)$  (the probability that a lineage in state  $i$  at time  $t$  goes extinct before the present) by enumerating the scenarios that could occur in the interval  $\Delta t$ : (i) the lineage goes extinct in the interval  $\Delta t$ ; in the remaining three scenarios, the lineage does not go extinct in the interval, and (ii) nothing happens (no extinction, speciation or diversification-rate shift in the interval  $\Delta t$ ), with subsequent extinction before the present, (iii) the lineage speciates in the interval  $\Delta t$ , with subsequent extinction of both daughter lineages before the present, or (iv) the lineage experiences a diversification-rate shift from rate category  $i$  to  $j$ , with subsequent extinction before the present. Segments of the tree are colored as described in the key for Figure 2.



179 a diversification-rate shift from category  $i$  to category  $j$ , and subsequently goes extinct before the present,  
 180 which occurs with probability  $E_j(t)$ . As before, we can compute  $E_i(t+\Delta t)$  by writing the set of  $k$  difference  
 181 equations  $E_1(t+\Delta t), E_2(t+\Delta t), \dots, E_k(t+\Delta t)$ :

$$E_i(t+\Delta t) = \begin{aligned} & \mu_i \Delta t && (i) \text{ The lineage goes extinct within the interval,} \\ & + (1 - \mu \Delta t) \times && \text{or, no extinction within the interval and} \\ & \left[ \begin{aligned} & (1 - \eta \Delta t)(1 - \lambda_i \Delta t) E_i(t) && (ii) \text{ nothing happens, with subsequent extinction,} \\ & + (1 - \eta \Delta t) \lambda_i \Delta t E_i(t)^2 && \text{or, (iii) speciation and two subsequent extinctions,} \\ & + (1 - \lambda_i \Delta t) \sum_{j \neq i}^k \frac{\eta \Delta t}{k-1} E_j(t) \end{aligned} \right] && \text{or, (iv) shift to rate } j, \text{ with subsequent extinction.} \end{aligned} \quad (2)$$

182 We now derive the ordinary differential equations from the corresponding difference Equations 1 and 2.  
 183 This requires some algebra (which includes dividing by the interval  $\Delta t$  and omitting terms of order  $(\Delta t)^2$ )  
 184 and results in the coupled ordinary differential equations (ODEs):

$$\frac{dD_i(t)}{dt} = -(\lambda_i + \mu_i + \eta) D_i(t) + 2\lambda_i D_i(t) E_i(t) + \sum_{j \neq i}^k \frac{\eta}{k-1} D_j(t) \quad (3)$$

$$\frac{dE_i(t)}{dt} = \mu_i - (\lambda_i + \mu_i + \eta) E_i(t) + \lambda_i E_i(t)^2 + \sum_{j \neq i}^k \frac{\eta}{k-1} E_j(t). \quad (4)$$

185 These differential equations are solved for each branch of the phylogeny and compute the probability of an  
 186 observed lineage. As an aside, we note that we store the values of  $D_i(t)$  and  $E_i(t)$  computed at some interval,  
 187  $\Delta \delta$ . We will use these stored values for the procedure that maps diversification-rate shifts over the tree (see  
 188 the description of the forwards algorithm, below).

189 Because we are moving backward in time, each branch will end at the speciation event by which it  
 190 originated. For a speciation event that occurs at time  $t$  while the process is in diversification-rate category  
 191  $i$ , we initialize the probability density of the immediately ancestral lineage,  $A$ , by taking the product of  
 192 its two daughter species at time  $t$  ( $D_i^L(t)$  and  $D_i^R(t)$ ) multiplied by the probability density of the observed  
 193 speciation event at time  $t$ ,  $\lambda_i$ :

$$D_i^A(t) = D_i^L(t) \times D_i^R(t) \times \lambda_i.$$

194 The algorithm terminates when we reach the most ancient speciation event in the tree (*i.e.*, at the root).  
 195 Upon reaching the root of the tree, we will have computed the vector of  $k$  probabilities,  $D_i(T)$ , where  
 196  $i \in \{1, 2, \dots, k\}$ .  $D_i(T)$  is the probability of observing the entire tree under the lineage-specific birth-death-  
 197 shift process given that the process was initiated in diversification-rate category  $i$  at the root. We then  
 198 multiply each of these  $k$  probabilities by their corresponding prior probabilities,  $\pi_i$ . The prior probability  
 199 for rate category  $i$  specifies the probability that the diversification process started in category  $i$  at the root.

200 Recall that each of the  $k$  discrete diversification-rate categories has equal probability (*i.e.*, they are quantiles  
201 of the corresponding base distributions). Therefore, we assume that all of the  $k$  diversification-rate categories  
202 have equal prior probability,  $\pi_i = 1/k$  (*i.e.*, a discrete uniform prior distribution). The product of the root  
203 probability for diversification-rate category  $i$  and the prior probability for diversification-rate category  $i$  gives  
204 the probability of rate category  $i$ . Finally, the sum of these  $k$  probabilities gives the probability of the entire  
205 tree under the lineage-specific birth-death-shift model

$$P(T) = \sum_i^k \pi_i \times D_i(T).$$

206 We will call this probability  $P(T)$  of the ‘observed’ phylogeny the likelihood function under the numerical  
207 integration approach because we perform parameter estimation in a Bayesian statistical framework.

### 208 *Estimating Branch-Specific Speciation and Extinction Rates using Stochastic Character* 209 *Mapping (forward algorithm)*

210 The backwards algorithm computes the probability of the observed tree under the lineage-specific birth-death-  
211 shift process. In doing so, however, the numerical marginalization ‘integrates out’ the focal parameters: the  
212 branch-specific diversification rates. Therefore, we adopt an approach to estimate the branch-specific rates  
213 of speciation and extinction that is based on stochastic character mapping (Huelsenbeck et al. 2001; Nielsen  
214 2002; Landis et al. 2018; Freyman and Höhna 2019). Under stochastic character mapping, character histories  
215 are simulated in a forwards traversal of the tree (*i.e.*, moving over the tree from the root to its tips), where  
216 each history specifies the number, location and magnitude of character-state changes. Here, we adopt the  
217 algorithm developed by Freyman and Höhna (2019) for mapping diversification histories. The objective is  
218 to compute the probability that the diversification process is in each of the  $k$  rate categories,  $F_i(t-\Delta t)$ . To  
219 compute  $F_i(t-\Delta t)$  we take the product of three probability components: the initial probabilities of the  $i$  rate  
220 categories at the beginning of the interval,  $F_i(t)$ , the forward probabilities of the process over the interval  
221  $\Delta t$ , and the conditional likelihoods of the process between  $(t-\Delta t)$  and the present,  $D(t-\Delta t)$ .

222 Our algorithm starts at the root of the tree, where we initialize the diversification process by randomly  
223 drawing one of the  $k$  rate categories proportional to their corresponding probabilities at the root,  $P_i(T)$ .  
224 Next, we initialize the forward probability  $F_i(t)$  of the selected rate category with probability 1, and the  
225 other  $(k-1)$  rate categories have zero probability (*i.e.*,  $F_i(T) = 1$  and  $F_{j \neq i}(T) = 0$ ). Then, we begin our  
226 traversal in tiny time steps,  $\Delta t$ , forward in time from time  $t$  to time  $(t-\Delta t)$ . We calculate the probability  
227  $F_i(t-\Delta t)$  that the diversification process is in rate category  $i$  at time  $(t-\Delta t)$  by enumerating all of the  
228 scenarios that could occur within the interval  $\Delta t$  that result in the lineage being in rate category  $i$  at time  
229  $(t-\Delta t)$ , given the initial state,  $F_i(t)$  (see Equation 5). We have the same four scenarios as in Figure 2 and  
230 Equation 1, so we omit a repetition of the details here. The main difference is the direction of time (*i.e.*, we  
231 move forwards in time) and that the surviving lineage at time  $(t-\Delta t)$  must evolve into the lineage observed  
232 at the present, which occurs with probability  $D_i(t-\Delta t)$ . We compute  $F_i(t-\Delta t)$  by writing the set of  $k$

233 difference equations  $F_1(t-\Delta t), F_2(t-\Delta t), \dots, F_k(t-\Delta t)$ :

$$\begin{aligned}
 F_i(t-\Delta t) = & \hspace{15em} (5) \\
 & D_i(t-\Delta t) \times (1-\mu_i\Delta t) \times \hspace{10em} \text{No extinction, and;} \\
 & \left[ \begin{aligned}
 & (1-\lambda_i\Delta t) \times (1-\eta\Delta t) F_i(t) \hspace{10em} (i) \text{ nothing happens,} \\
 & + (1-\eta\Delta t)\lambda_i\Delta t E_i(t-\Delta t) F_i(t) \hspace{5em} \text{or (ii) no rate shift, speciation, left extinction,} \\
 & + (1-\eta\Delta t)\lambda_i\Delta t E_i(t-\Delta t) F_i(t) \hspace{5em} \text{or (iii) no rate shift, speciation, right extinction,} \\
 & + (1-\lambda_j\Delta t) \sum_{j \neq i}^k \frac{\eta\Delta t}{k-1} F_j(t) \hspace{5em} \text{or (iv) no speciation, no extinction, shift to rate } i.
 \end{aligned} \right]
 \end{aligned}$$

234 As previously, we derive the ordinary differential equation from its corresponding difference Equation 5  
 235 by using some algebra and omitting terms of order  $(\Delta t)^2$ :

$$\frac{dF_i(t)}{dt} = -(\lambda_i + \mu_i + \eta)F_i(t)D_i(t) + 2\lambda_i F_i(t)D_i(t)E_i(t) + \sum_{j \neq i}^k \frac{\eta}{k-1} F_j(t)D_i(t). \quad (6)$$

236 We compute these probabilities by solving this ODE in a forwards traversal of the tree. Specifically, at a  
 237 given branch at time  $t$  where we just mapped the state  $i$ , we solve  $F_i(t)$  until time  $(t-\Delta\delta)$ . Note that  $\Delta t$   
 238 is much smaller than  $\Delta\delta$  ( $\Delta t \ll \Delta\delta$ ) because we take the limit of  $\Delta t \rightarrow 0$  in the numerical integration but  
 239 draw character maps only after a time step of  $\Delta\delta$ . Then, at time  $t-\Delta\delta$ , we draw one of the  $k$  diversification-  
 240 rate categories proportional to their corresponding probabilities,  $F_i(t-\Delta\delta)$ . The sampled rate category  
 241 becomes  $F_i(t-\Delta\delta) = 1$  for the next iteration of the recursive forwards algorithm. If the rate category  
 242 sampled at time  $(t-\Delta\delta)$  is the same as the initial rate category (at time  $t$ ), we paint the interval  $\Delta\delta$  of the  
 243 branch by the corresponding diversification-rate category. Conversely, if the rate category sampled at time  
 244  $(t-\Delta\delta)$  differs from the initial rate category (at time  $t$ ), we paint a diversification-rate shift between these  
 245 two rate categories within the interval  $\Delta\delta$ . The recursive algorithm continues moving forward in time and  
 246 terminates upon reaching the tips of the tree. Upon reaching the present, we will have mapped a complete  
 247 diversification-rate history that specifies the number and location of diversification-rate shifts and the rate  
 248 category for each branch of the tree.

### 249 *An Alternative Approach Using Data Augmentation*

250 Next, we develop a second numerical algorithm for estimating branch-specific diversification rates. Specif-  
 251 ically, our second approach is based on data augmentation (Dempster et al. 1977; Tanner and Wong 1987;  
 252 Gelfand and Smith 1990; Huelsenbeck et al. 2000; Landis et al. 2013; Uyeda and Harmon 2014), where we aug-  
 253 ment the study tree (*i.e.*, our actual data) with diversification histories (describing the number and location  
 254 of diversification-rate shifts and the rate category for every branch of the tree). We treat these diversification  
 255 histories as observations (*i.e.*, they augment our data). We compute the likelihood of each ‘observed’ diver-

256 sification history using a modified version of our backwards algorithm. We then use reversible-jump MCMC  
 257 (RJ-MCMC) to sample diversification histories in proportion to their posterior probability (see Appendix  
 258 A).

259 Consider a tree that has been augmented with a history that specifies the diversification-rate category  
 260 for every branch of the tree. As previously, we compute the probability of the observations (the phylogeny  
 261 and the ‘observed’ diversification history) using a backwards algorithm that moves over the tree from the  
 262 tips to the root in tiny time steps,  $\Delta t$ . For each interval, we compute the probability of the data by solving  
 263 a pair of ODEs that account for all of the scenarios that could occur over each step into the past. We begin  
 264 at the tips of the tree, where  $t = 0$  (the present), where we initialize the two probability terms,  $D(t)$  and  
 265  $E_i(t)$ . Observe that we use only a single probability term  $D(t)$  because a lineage that is in state  $i$  always  
 266 has probability  $D_j(t) = 0$  for all other diversification rate categories  $j$ . For all species we initialize  $D(0) = 1$   
 267 or in the case of incomplete sampling we initialize  $D(0) = \rho$ . Finally, we initialize the extinction probability  
 268 for each species as  $E_i(0) = 0$  for each of the  $i \in (1, \dots, k)$  diversification-rate categories (or in the case of  
 269 incomplete sampling we initialize  $E_i(0) = 1 - \rho$ ).

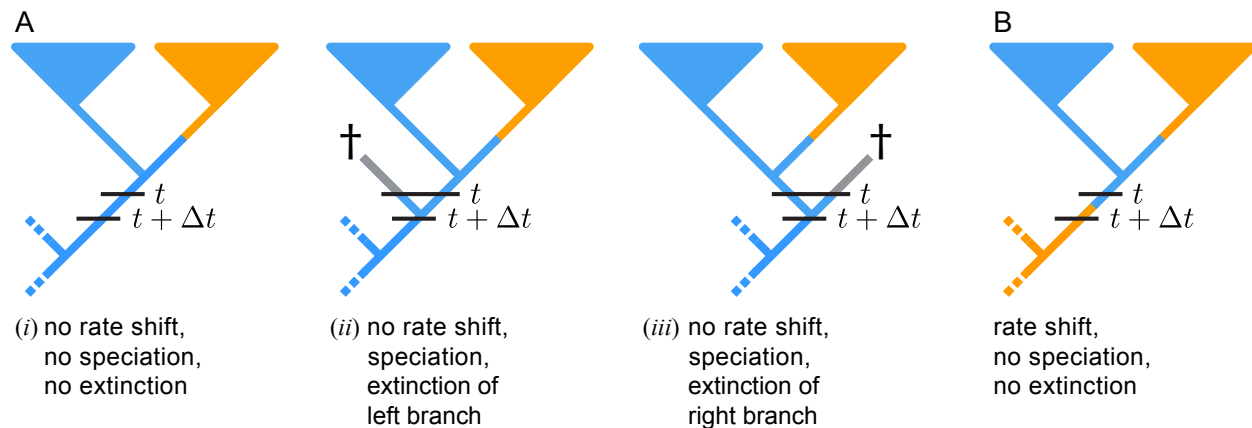

**Figure 4: Possible scenarios that could occur over an interval  $\Delta t$  under the data-augmentation approach.**

The observed phylogeny has been augmented with a diversification history (describing the number and location of rate shifts and the discrete rate category for every branch segment of the tree), which we treat as an observation. To compute the probability of the observed tree and the ‘observed’ history under the lineage-specific birth-death-shift process, we traverse the tree from the tips to the root in small time steps,  $\Delta t$ . For each step from time  $t$  to time  $(t+\Delta t)$ , we compute the probability of the observations by enumerating all of the possible scenarios that could occur over the interval  $\Delta t$ . (A) When no diversification-rate shift is ‘observed’ in the interval  $\Delta t$ , there are three scenarios: (i) nothing happens, or (ii) a speciation event occurs, where the right descendant survives and the left descendant goes extinct before the present, or (iii) a speciation event occurs, where the left descendant survives but the right goes extinct before the present. (B) Alternatively, a diversification-rate shift from category  $i$  to  $j$  is ‘observed’ within the interval  $\Delta t$ . Color key: segments of extant lineages are colored according to the ‘observed’ diversification history (blue segments are in rate category  $i$ , orange segments are in rate category  $j$ ); segments of the tree between  $t$  and an extinction event are colored gray because we average the extinction probabilities over the  $k$  discrete diversification-rate categories.

270 Next, we calculate the probability of the observed lineage and the ‘observed’ diversification history over  
 271 the interval  $(t+\Delta t)$  by enumerating all possible scenarios that could occur within the interval  $\Delta t$ . When a  
 272 diversification-rate shift is not ‘observed’ within the current interval, there are three possible scenarios that  
 273 could occur over the interval (see Equation 7 and Figure 4A), specifically: (i) no speciation event occurs (*i.e.*,  
 274 nothing happens), or (ii) a speciation event occurs and the left descendant subsequently goes extinct before  
 275 the present, or (iii) a speciation event occurs and the right descendant subsequently goes extinct before the

276 present. Accordingly, we can compute  $D(t+\Delta t)$  as a difference equation:

$$\begin{aligned}
 D(t+\Delta t) = & \hspace{15em} (7) \\
 & (1 - \mu_i \Delta t)(1 - \eta \Delta t) \times \hspace{2em} \text{In all cases, the lineage survives, no rate shift, and} \\
 & \left[ \begin{array}{l} (1 - \lambda_i \Delta t)D(t) \hspace{10em} (i) \text{ nothing happens,} \\ + \lambda_i \Delta t D(t) E_i(t) \hspace{10em} \text{or } (ii) \text{ speciation, left extinction,} \\ + \lambda_i \Delta t D(t) E_i(t) \hspace{10em} \text{or } (iii) \text{ speciation, right extinction.} \end{array} \right]
 \end{aligned}$$

277 The first two (unnumbered) terms in Equation 7 account for the probability that the observed lineage does  
 278 not go extinct in the interval  $\Delta t$  (otherwise it could not have been observed at the more recent time,  $t$ ), and  
 279 also for the probability that the lineage does not experience a diversification-rate shift in the interval  $\Delta t$   
 280 (because no diversification-rate shift was ‘observed’). Diversification-rate histories cannot be mapped onto  
 281 unobserved (extinct) branches. Therefore, we compute extinction probabilities,  $E_i(t)$ , in exactly the same  
 282 way as before (see Equations 2 and 4 and Figure 3).

283 As previously, we derive the ordinary differential equation from its corresponding difference Equation 7:

$$\frac{dD(t)}{dt} = -(\mu_i + \lambda_i + \eta)D_i(t) + 2\lambda_i D_i(t)E_i(t) \hspace{10em} (8)$$

284 As previously, we compute the probability of the observations by solving these ODEs (*i.e.*, by integrating  
 285 the change in probability over each time step,  $\Delta t$ , from the present to time  $t$ ).

286 We continue traversing the current branch toward the root of the tree (moving in small time steps,  $\Delta t$ ,  
 287 further into the past, and solving the coupled ODEs for each interval) until we either reach the end of the  
 288 branch (at a speciation event, in which case the probabilities are propagated as described previously), or  
 289 we encounter a diversification-rate shift. When we encounter an ‘observed’ diversification-rate shift from  
 290 category  $i$  to category  $j$  (where  $i \neq j$ ), we initialize  $D'(t)$  as:

$$D'(t) = D(t) \times \frac{\eta}{k-1},$$

291 which is the current probability of the observed lineage multiplied by the probability density of ‘observing’  
 292 a diversification-rate shift to one of the other  $(k-1)$  rate categories at time  $t$  (Figure 4B). The algorithm  
 293 terminates when we reach the root of the tree. Since we are only considering one term  $D(t)$  for the ob-  
 294 served lineages in any state  $i$ , this probability  $D(t)$  gives us directly the probability of observing the tree  
 295 and diversification rate history. We will call this probability of the ‘observed’ phylogeny augmented with  
 296 diversification histories the likelihood function under the data-augmentation approach because we perform  
 297 parameter estimation in a Bayesian statistical framework.

## VALIDATING THE THEORY AND IMPLEMENTATION

We performed several tests to evaluate both the underlying theory and the implementation of the lineage-specific birth-death-shift model in `RevBayes`, including: (1) comparing analytical likelihoods to those estimated using the two methods under the special case where there are no diversification-rate shifts, (2) comparing analytical and empirical distributions of the number of diversification-rate shifts under the special case where all rate categories are identical, (3) comparing parameter estimates under the two theoretically equivalent but independent approaches, (4) assessing the computational efficiency of the two approaches, and (5) assessing the ability of the method to recover true parameter values under simulation. We briefly describe each of these experiments below (we provide further details of these analyses in the Supplementary Material and the scripts available online from <https://github.com/hoehna/birth-death-shift-analyses>).

### *Comparing Analytical and Numerically Approximated Probabilities for the Special Case of a Constant-Rate Birth-Death Process*

Recall that there is no analytical solution for computing the likelihood under the lineage-specific birth-death-shift process, which motivates the development of our two numerical algorithms. However, the likelihood can be computed analytically for the special case when  $\eta = 0$  (*i.e.*, when the process simplifies to a constant-rate birth-death process). Thus, we compare the analytical likelihood to that approximated using the two numerical methods under the special case of a constant-rate birth-death process. If our derivation and implementation are correct, and we chose a sufficiently small  $\Delta t$ , then the likelihoods should be exactly identical under the three different methods.

For the computations, we set all of the  $k$  diversification-rate categories equal, assumed  $k = 4$  discrete rate categories, and set  $\eta = 0$  (the rate of diversification-rate shifts). We then computed the likelihood over a range of relative-extinction rates,  $\epsilon = \{0, \dots, 1\}$  using the analytical solution under the constant-rate birth-death process, the numerical-integration and data-augmentation methods. As expected, plots of the analytical and numerically approximated likelihoods are identical (Figure 5), confirming both the derivation and implementation of the two numerical algorithms.

### *Comparing Analytical and Estimated Distributions for the Number of Diversification-Rate Shifts*

Second, we compare the analytical and estimated probability distributions on the number of diversification-rate shifts. Under the lineage-specific birth-death-shift process, waiting times between diversification-rate shifts are exponentially distributed with rate  $\eta$ . If we constrain the  $k$  diversification-rate categories to be equal, then diversification-rate shifts among those  $k$  identical rate categories will have no impact on the probability of speciation or extinction. The difference in the probability of the observed phylogeny stems only from the probability of the number of diversification-rate shift events but not the probability of speciation

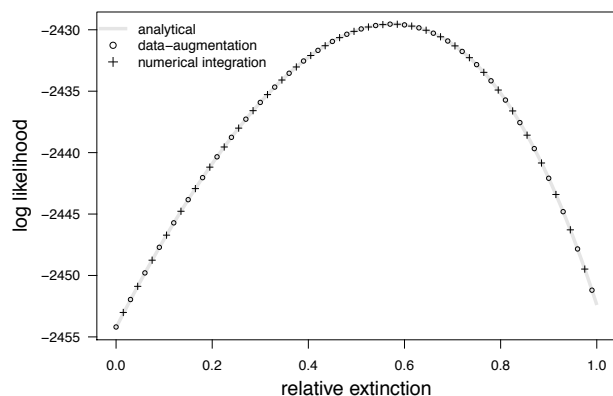

**Figure 5: Comparing the analytical likelihoods to those approximated using the numerical algorithms when  $\eta = 0$ .** We can analytically compute the likelihood under the special case where the rate of diversification-rate shifts is zero. We plot the analytical likelihood over a range of values for the relative-extinction rate,  $\epsilon = \mu \div \lambda$  (shaded line), and compare these values to those estimated using the numerical-integration method ( $\times$  symbols) and the data-augmentation method ( $+$  symbols). The analytical and estimated likelihoods are identical, confirming the correctness of the derivation and implementation of the independent methods.

331 and extinction. In this case, the number of diversification-rate shifts over the branches of the tree is Poisson  
 332 distributed with rate  $\eta \times TL$  where  $TL$  is the tree length (*i.e.*, the sum of all of branch lengths in the tree).

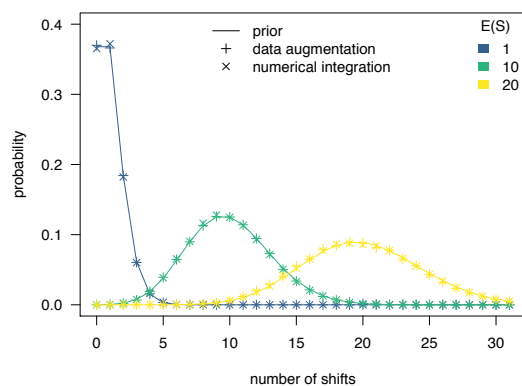

**Figure 6: Distribution of the number of diversification-rate shifts when all categories have an identical diversification rate.**

The plot depicts the analytical distribution of the number of diversification-rate shifts over a set of values for the shift-rate,  $\eta$ , that specify a corresponding range of values for the expected number of diversification-rate shifts  $E(S) = \{1, 10, 20\}$ . We estimated the number of diversification-rate shifts using both the numerical-integration method ( $\times$  symbols) and the data-augmentation method ( $+$  symbols) for the same range of shift-rate priors when the diversification rate was specified to be the same for all of the  $k$  diversification-rate categories. The analytical and estimated distributions are identical, confirming the correctness of the derivation and implementation of the independent methods.

333 We first plot the analytical distribution for the number of diversification-rate shifts over a set of values for  
 334 the shift-rate prior that specify a corresponding range of values for the expected number of diversification-  
 335 rate shifts,  $E(S) = \{1, 10, 20\}$ . Next, we estimate the posterior number of diversification-rate shifts using our  
 336 two independent implementations. The distribution for the number of diversification-rate shifts estimated

337 using either approach should follow the corresponding analytical distribution. As expected, plots of the  
338 analytical and estimated probability distributions for the number of diversification-rate shifts are identical  
339 (Figure 6), confirming that both numerical algorithms are correctly implemented in *RevBayes*. Moreover,  
340 this result does not only confirm our implementation of the probability of an observed phylogeny under the  
341 lineage-specific birth-death-shift model but specifically validates the MCMC algorithms to sample from the  
342 number of diversification-rate shift events under the prior distribution.

### 343 *Comparing Branch-Specific Parameter Estimates Between the Two Implementations*

344 The data-augmentation and stochastic character mapping method for estimating branch-specific speciation  
345 and extinction rates rely on different likelihood functions as well as different MCMC algorithms. Nevertheless,  
346 both methods should provide the same estimated posterior distribution of branch-specific speciation and  
347 extinction rates. Therefore, we estimated branch-specific speciation and extinction rates using both methods  
348 and compared the results over a range of values for the number of discrete diversification-rate categories,  
349  $k = \{4, 6, 8, 10, 20\}$ . The models for both analyses were set to be exactly the same so that we expected  
350 that branch-specific diversification rates are the same (up to some stochasticity due to the MCMC sampling  
351 procedure).

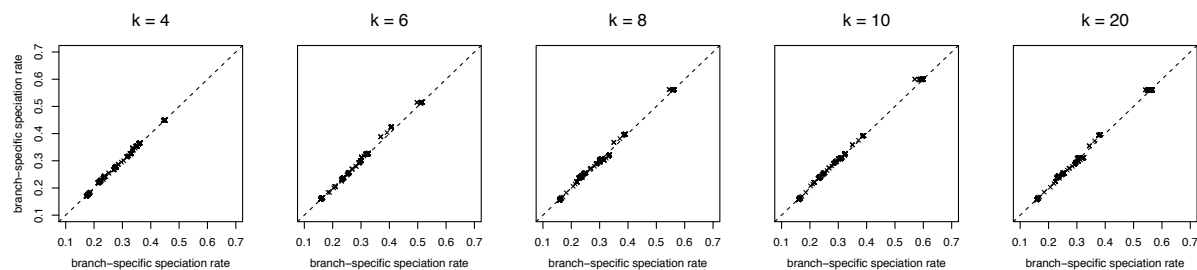

**Figure 7: Comparison between branch-specific speciation rate estimates using data-augmentation and stochastic character mapping.** We estimated branch-specific speciation and extinction rates using our data-augmentation and stochastic character mapping methods with  $k = \{4, 6, 8, 10, 20\}$  rate categories respectively. For each branch, we calculated the average speciation and extinction rates, *i.e.*, if there was a rate-shift event, then we computed the weighted average of the rates weighted by the time spent in a rate category. This plot shows the mean posterior estimates for both methods. As we expect, both method provide the same rate estimates.

352 Figure 7 shows the estimated posterior mean of the branch-specific mean speciation rates. The estimates  
353 of the two alternative methods are nicely correlated. This correlation demonstrates that our derivation of the  
354 theory and implementation are (mostly likely) correct. It would have been very unlikely that we introduced  
355 the same mistake in the two independent methods giving the exact same bias. Note that this validation is  
356 stronger than comparing two independent implementations of the same method because we show that two  
357 different methods using different derivations of the likelihood yield the same results if applied to the same  
358 model.



359 *Computational Efficiency of Data-Augmentation and Stochastic Character Mapping*

360 The theory and derivation predicts that the data-augmentation and stochastic character mapping methods  
 361 yield identical estimates of branch-specific diversification rates. We have established in Figure 7 that indeed  
 362 both methods provide identical branch-specific diversification rate estimates. Until now, all implementations  
 363 of similar methods use only a data-augmentation approach (Rabosky 2014; Barido-Sottani et al. 2018).

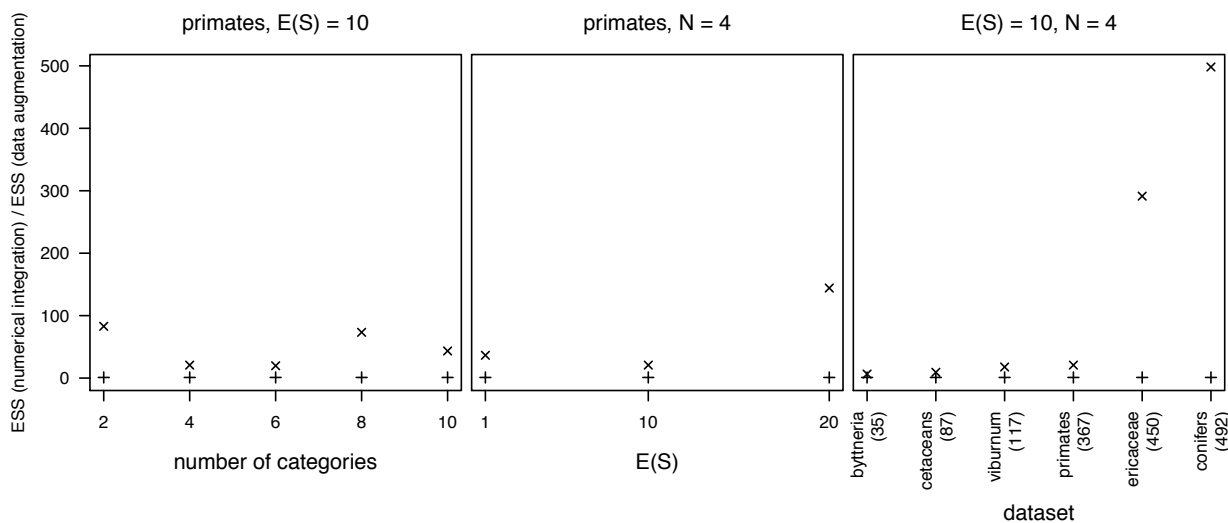

**Figure 8: Comparison of MCMC performance between data augmentation and marginalization.** We computed branch-specific diversification rates using our two implementations for the primates phylogeny for different number of rate categories (left) and different number of expected shift events (middle). Additionally, we used several different phylogenies to assess the impact of tree size (right). We plot here the effective sample size (ESS) of the numerical integration method normalized by the ESS of the data-augmentation method. Thus, we show the performance gain in MCMC efficiency of the numerical integration method compared to the data-augmentation method.

364 Since both approaches give identical estimates, we are interested in which method is computationally  
 365 more efficient. We performed a set of MCMC analyses under identical model settings for both methods over  
 366 a range of datasets (providing a range of tree sizes). We assessed the impact of (a) number of diversification-  
 367 rate categories  $k$ , (b) the expected number of diversification-rate shifts  $E(S)$ , and (c) the tree size.

368 The stochastic character mapping method outperforms the data-augmentation method with respect to  
 369 higher effective sample size per CPU second (Figure 8). The main advantage of the stochastic character  
 370 mapping method is that it does not need additional parameters such as the number, location/timing and  
 371 magnitude of the diversification-rate shifts. Instead, the rate-shift events are directly sampled from the con-  
 372 ditional posterior distribution, which is extremely efficient. It is therefore not surprising that the stochastic  
 373 character mapping method is computationally superior. Indeed, we had considerable problems to obtain  
 374 convergence using the data-augmentation method. Thus, we recommend biologists who are interested in  
 375 estimating branch-specific diversification rates to use the stochastic character mapping method only and we  
 376 will do so for the following sections.

377

### Validation using Simulation

378 Our implementation of the lineage-specific birth-death-shift process in RevBayes allows for performing pa-  
379 rameter inference and simulating under the process. Here we describe a small simulation study focused on  
380 confirming that our implementation is correct, and we leave exploring the model's full range of statistical  
381 behavior under various diversification scenarios to future work. To this end, we simulated trees under the  
382 lineage-specific birth-death-shift process, estimated the branch-specific net-diversification rates using MCMC  
383 sampling, and confirmed that the credible intervals of our branch-specific net-diversification rates had the  
384 correct coverage.

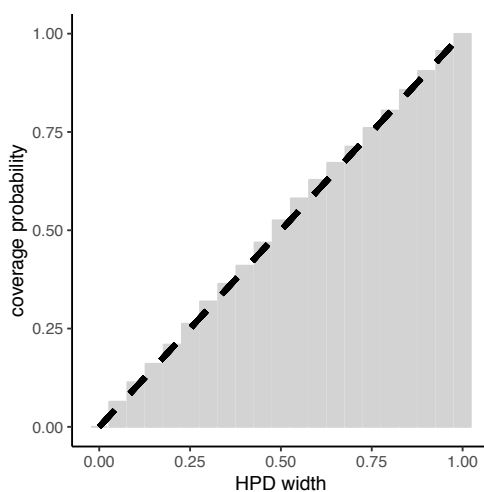

**Figure 9: Coverage probabilities of branch-specific net diversification rate estimates for different credible interval widths.** The coverage probabilities ( $y$ -axis) of branch-specific net-diversification rate estimates are plotted at different highest posterior density interval widths ( $x$ -axis). The coverage probabilities were calculated as the proportion of times across the 100 simulation replicates the credible interval contained the true simulated branch-specific net-diversification rate. If our model and the inference machinery is implemented correctly this should correspond with the diagonal line where  $y = x$  (dashed line).

385 We simulated 1000 trees under the lineage-specific birth-death-shift process using 4 rate categories con-  
386 ditional on having 200 surviving tips. We rather arbitrarily chose 200 surviving tips because these simulated  
387 datasets were not too small for reliable inference and yet still small enough to run reasonably fast. Trees were  
388 simulated in forward time until 201 lineages were alive. The trees were then trimmed back in time randomly  
389 within the interval between where there were 200 and 201 lineages. We then estimated the branch-specific  
390 diversification rates for each simulated tree using the numerical-integration method (more details about the  
391 simulation and inference settings are given in the Supplementary Material).

392 If our implementation of the lineage-specific birth-death-shift process and MCMC sampling machinery is  
393 implemented correctly, then we should obtain coverage probabilities that are equal to the width of the credible  
394 interval (Huelsenbeck and Rannala 2004). Here we used coverage probabilities as the proportion of times  
395 across the 1000 simulation replicates the credible interval of estimated branch-specific net-diversification  
396 rate contained the true simulated value. Figure 9 shows that coverage probabilities are equal to their  
397 corresponding credible intervals. Thus, we obtained more evidence that our software implementation is  
398 correct.

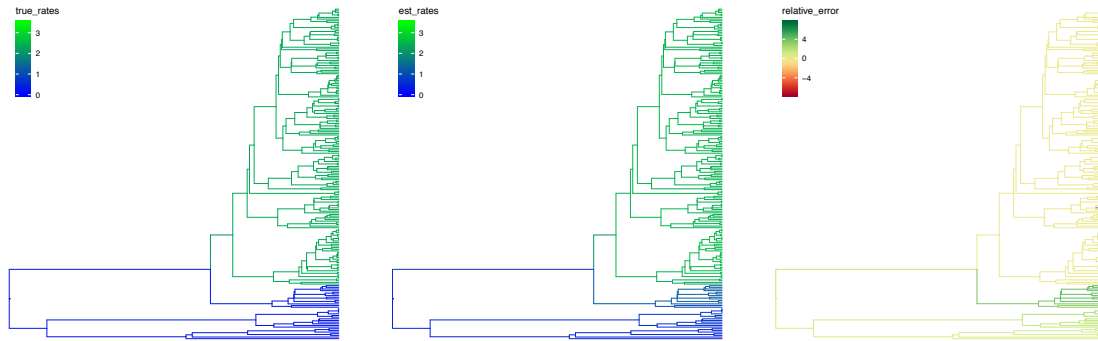

**Figure 10: An example replicate from the simulation study.** *Left:* A tree simulated using RevBayes under the lineage-specific birth-death-shift process with the branches colored to show the true mean branch-specific net diversification rates. *Center:* Estimates of the branch-specific net diversification rates made by RevBayes. Diversification rate shifts in large clades are accurately estimated, however diversification rate shifts in lineages leading to small clades were not detected due to the small number of branches resulting in a lack of power. *Right:* The precision of net diversification rate estimates measured as the relative error in the branch-specific rate estimates. The relative error is low throughout the tree except for places in which rate shifts occurred in small clades.

399 Figure 10 illustrates one example of the simulation replicates used. This example demonstrates that the  
400 overall precision of estimated net-diversification rates is high. The method particularly has power to detect  
401 the location of diversification rate shifts when they lead to large clades. The method has little power to  
402 detect those diversification rate shifts that lead to small clades.

## 403 EMPIRICAL EXAMPLE ANALYSIS OF PRIMATES

404 Next, we complement our method-validation with an exemplary analyses of an empirical primate phylogeny  
405 obtained from Springer et al. (2012). Our objective is to explore several important aspects of the lineage-  
406 specific birth-death-shift model, including: (1) assessing the sensitivity of branch-specific diversification-rate  
407 estimates to the assumed number of diversification-rate categories  $k$ , (2) assessing the sensitivity of posterior  
408 estimates of the number of diversification-rate shifts to the choice of shift-rate prior, and (2) assessing the  
409 sensitivity of posterior estimates of the branch-specific diversification rates to the choice of shift-rate prior.  
410 We briefly describe each of these experiments below (again, we provide further details of these analyses in  
411 the Supplementary Material and scripts available online).

### 412 *Robustness of Branch-Specific Diversification Rate Estimates to the Number of* 413 *Diversification-Rate Categories*

414 Recall that we approximate the continuous base distribution of the speciation and and extinction rate using  
415 discretization (Figure 1). The quality of this approximation depends on the chosen number of discrete rate  
416 categories. When we use a small number of categories, the estimates of the branch-specific speciation rates  
417 may be biased, but as the number of rate categories increases to infinity, the discretized process should  
418 converge toward the continuous one. Unfortunately, increasing the number of rate categories comes with

419 some cost, as the time it takes to compute the probability of a tree is proportional to the number of rate  
420 categories.

421 Here we explored the impact of the number of diversification rate categories on branch-specific diversi-  
422 fication rate estimates. Specifically, we estimated the branch-specific speciation rates for different numbers  
423 of rate categories,  $k = \{2, 4, 6, 8, 10, 20\}$ . Then, we compared the branch-specific speciation rate estimates  
424 of adjacent numbers of diversification rate categories (*i.e.*, 2 vs. 4, 4 vs. 6, etc.). Indeed, when the number  
425 of rate categories is low, branch-specific rate estimates are sensitive to the chosen number of rate categories  
426 (Figure 11, left panels). Encouragingly, as the number of rate categories increases, the branch-specific rate  
427 estimates converge toward the same values (Figure 11, right panels). These results suggest that an adequate  
428 approximation of the continuous distribution can be achieved with few diversification rate categories. In our  
429 case, 6 diversification rate categories seem to be a sufficient approximation but we choose 10 rate categories  
430 to be slightly conservative. As a general rule, using a  $k = 10$  runs reasonably efficient while large values of  
431  $k$  (*e.g.*, 100 or more) become computationally infeasible.

### 432 *Prior Sensitivity of the Estimated Number of Diversification-Rate Shifts*

433 Previous work has shown that the inferred number of diversification-rate shifts in birth-death-shift models  
434 can be extremely sensitive to the prior on the rate of shifts (Moore et al. 2016). Therefore, we analyzed the  
435 primate phylogeny under a range of priors on  $\eta$  specified so that the expected number of diversification-rate  
436 shift events under a Poisson process was  $E(S) = \{1, 10, 20\}$ . For each shift-rate prior, we estimated the  
437 corresponding marginal posterior distribution for the number of diversification-rate shifts.

438 While the posterior number of diversification-rate shifts (slightly) departed from their respective prior  
439 distributions, they nevertheless are (very) sensitive to the prior (Figure 12). This results implies that  
440 estimates of the number of rate-shift events have to be treated carefully and are only meaningful in the  
441 context of their corresponding prior distribution. More work is needed to evaluate how robust estimates of  
442 the number of rate-shift events are and how much power there is to detect such events. In the meantime,  
443 we strongly recommend that researchers perform inference under a range of prior choices for the expected

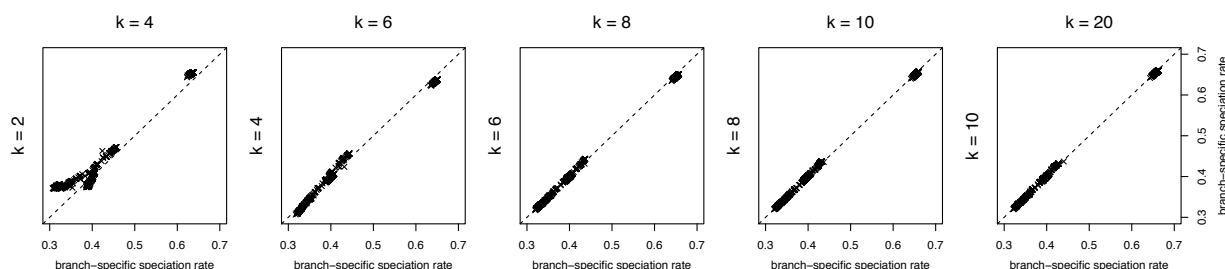

**Figure 11: Comparison of branch-specific rate estimates for different numbers of diversification-rate categories.** We estimated the posterior mean branch-specific speciation rate for each branch of the primate tree where the number of rate categories was set to  $k = \{2, 4, 6, 8, 10, 20\}$ . We then compared the mean estimates of the rates between adjacent pairs of the number of diversification-rate categories. For small numbers of diversification-rate categories, the branch-rate estimates are quite different between adjacent settings. However, as the number of categories increases, the branch-specific diversification rate estimates converge toward stable estimates.

444 number of rate-shift events.

445 *Robustness of Branch-Specific Diversification-Rate Estimates to the Prior on the Expected*  
446 *Number of Diversification-Rate Shifts*

447 Posterior estimates of the number of diversification-rate shifts are quite sensitive to the choice of shift-rate  
448 prior (Figure 12). However, it remains unclear whether other parameters (*e.g.*, branch-specific speciation  
449 rates) may also be similarly sensitive to the choice of shift-rate prior. To understand the robustness of  
450 branch-specific speciation-rate estimates to the prior on  $\eta$ , we compared the posterior means of branch-  
451 specific average speciation-rate parameters estimated under different prior values of  $E(S)$ .

452 In contrast to the estimated number of diversification-rate shifts, the branch-specific diversification rate  
453 estimates are less sensitive to the prior on  $\eta$  (Figure 13). For example, in all cases we infer increased speciation  
454 rates in a subclade of the Old World Monkeys (Figure 14). We therefore recommend that biologists focus on  
455 the branch-specific diversification rate estimates as the the parameter of interest because we can estimate  
456 them more robustly.

457 **DISCUSSION**

458 *Model Parameterization and Prior Specification*

459 Our lineage-specific birth-death-shift process consists of three event types (speciation, extinction, and rate-  
460 shifts) which are governed by their respective rates. The speciation and extinction rates are drawn from

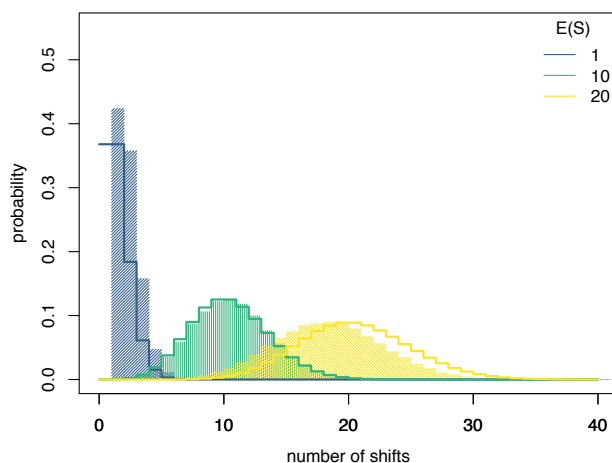

**Figure 12: Comparison between the prior number of diversification-rate shifts and the posterior number of diversification-rate shifts for different shift-rate priors.** We estimated the posterior number of diversification-rate shifts (shaded bars) in the primate phylogeny under three different shift-rate priors, with the prior on  $\eta$  specified so that the prior expected number of shifts under a Poisson process,  $E(S)$ , was 1, 10, or 20 (solid lines). The posterior number of diversification-rate shifts is very sensitive to these prior settings although not exactly matching the prior distributions.

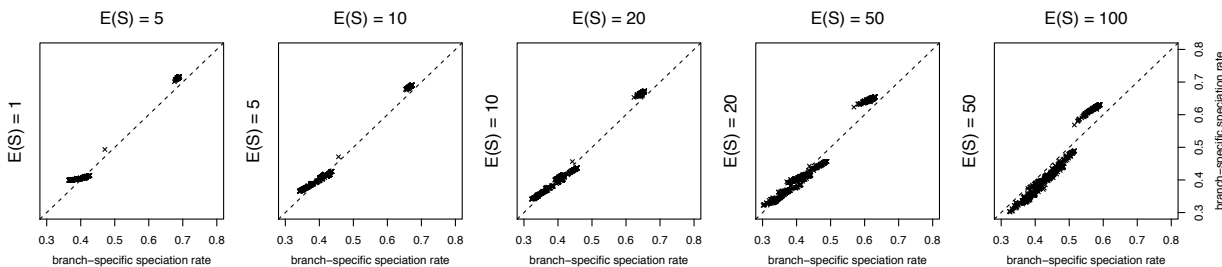

**Figure 13: Comparison of branch-specific speciation-rate estimates between different priors on the expected number of diversification-rate shifts.** We estimated the posterior mean speciation rate for each branch of the primate tree under different shift-rate priors, with the prior on  $\eta$  specified so that the prior expected number of rate-shift events under a Poisson process,  $E(S)$ , was 1, 10, 20, 50 or 100. Despite the estimated number of diversification-rate shifts being prior sensitive (Figure 7), the branch-specific speciation-rate estimates are relatively robust to the prior on the expected number of diversification-rate shifts.

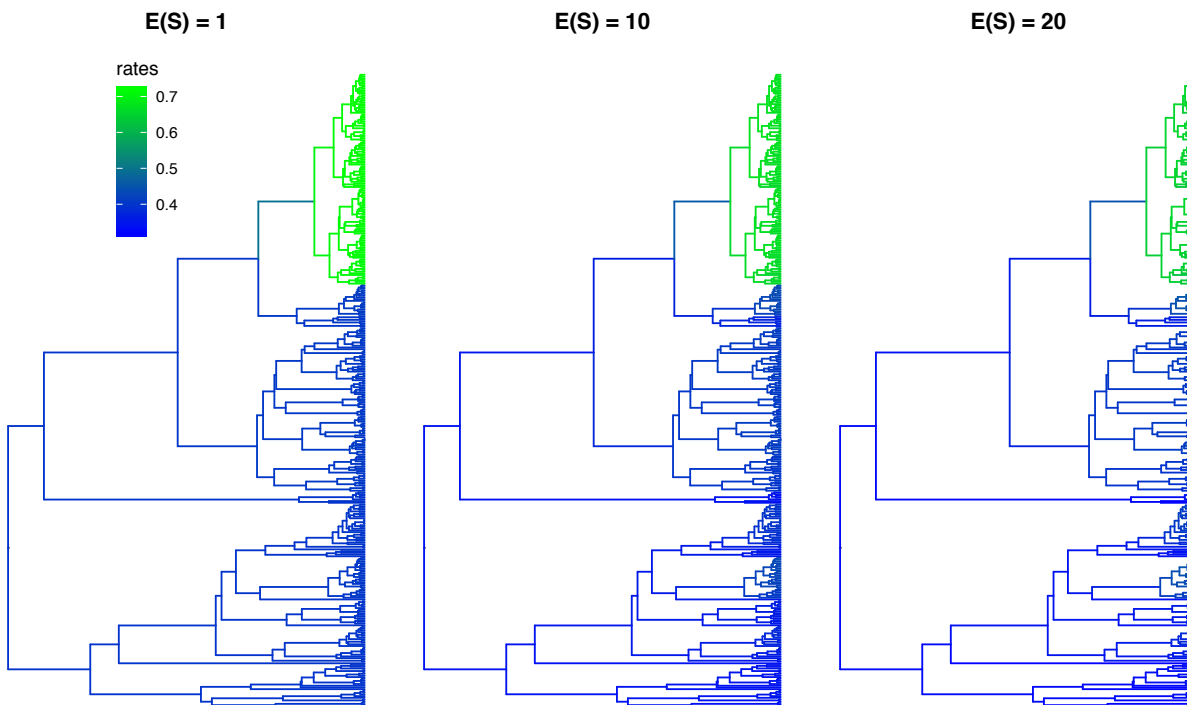

**Figure 14: Branch-specific speciation-rate estimates for the primate tree under different shift-rate priors.**

We performed lineage-specific birth-death-shift analyses to estimate the posterior mean speciation rate for each branch of the primate tree under three different shift-rate priors, specified such that the expected number of diversification-rate shifts,  $E(S)$ , was 1, 10, or 20. Branch colors reflect the branch-specific speciation-rate estimates; the scale bar is the same for all prior settings.

461 some base distribution whereas the shift-rate is constant (*i.e.*, homogeneous) over the entire phylogeny. In  
 462 this study we have taken a first step to explore the robustness of parameter estimates (*i.e.*, branch-specific  
 463 diversification rates and the number of diversification-rate shifts).

464 In our analyses on simulated and empirical data we observed that the estimated number of diversification-  
 465 rate shifts is sensitive to the choice of shift-rate prior (Figure 12). We have not explored the impact of the

466 shape of the base distributions on the speciation and extinction rates. Instead, we emphasize that our  
467 implementation in **RevBayes** allows flexible parameterization of the lineage-specific birth-death-shift model.  
468 Here, we provide the foundation for further model exploration. We elaborate on the full flexibility of the  
469 model specification below.

470 *Model parameterization*— The lineage-specific birth-death-shift process defines a family of models that make  
471 different assumptions regarding the nature of diversification-rate variation across lineages. For example, the  
472 most general parameterization allows both speciation and extinction rates to vary independently across the  
473 tree. Under this model, a diversification-rate shift involves a change to new speciation and extinction rates  
474 that are independently drawn from their corresponding base distributions. From this model, two nested  
475 models can be specified: (1) a model that allows speciation rates to vary across the tree, but assumes a  
476 shared extinction rate for all branches (*i.e.*, diversification-rate shifts involve changes to the speciation rate),  
477 and (2) a second model that allows extinction rates to vary across the tree, but assumes a shared speciation  
478 rate for all branches (*i.e.*, diversification-rate shifts involve changes to the extinction rate). These models  
479 may also be parameterized using composite diversification-rate parameters, where diversification-rate shifts  
480 involve changes to the net-diversification rate,  $r = (\lambda - \mu)$  and/or the relative-extinction rate,  $\epsilon = (\mu \div \lambda)$ .

481 Finally, we could parametrize the lineage-specific birth-death-shift model where speciation and extinction  
482 rates are assumed to vary dependently across the tree. Under this model, a diversification-rate shift involves  
483 a change from one pair of rates  $(\lambda_i, \mu_i)$ , (where  $i$  corresponds to the same discrete rate category of both base  
484 distributions) to a new pair of speciation and extinction rates  $(\lambda_j, \mu_j)$ . For example, a diversification-rate  
485 shift might involve a change from paired rates  $(\lambda_3, \mu_3)$  to  $(\lambda_5, \mu_5)$  (reflecting a shift from the third to the  
486 fifth discrete categories of the speciation- and extinction-rate base probability distributions).

487 In **RevBayes** we provide full flexibility of applying any variant of how diversification rates change across  
488 lineages. It remains open to the biologist and further studies which type of diversification-rate variation is  
489 most prevalent and robust.

490 *Prior distribution on the diversification rates*— We adopt a Bayesian statistical approach to estimate the  
491 parameters of the lineage-specific birth-death-shift model. Therefore, we must specify a prior probability  
492 distribution for each parameter. Parameters of the lineage-specific birth-death-shift model are the speciation  
493 rate,  $\lambda$ , the extinction rate,  $\mu$ , and the rate of diversification-rate shifts,  $\eta$ . Our implementation in **RevBayes**  
494 provides tremendous flexibility in the choice of priors for each parameter. For example, we might specify a  
495 lognormal, gamma, or exponential probability distribution as the prior on the speciation rate. Additionally,  
496 for a given choice of prior, **RevBayes** allows the user to either specify fixed values for the parameters of  
497 the chosen prior probability distribution (the ‘hyperparameters’), or to specify a more hierarchical Bayesian  
498 model by treating these hyperparameters as random variables (in which case we would specify a hyperprior  
499 for each hyperparameter). For example, if we chose a lognormal prior for the speciation rate, we could either  
500 specify fixed values for the parameters of this distribution (*i.e.*, the mean and standard deviation of the  
501 lognormal distribution), or we could specify hyperprior distributions for the mean and standard deviation  
502 hyperparameters. Thus, our implementation in **RevBayes** provides much more flexibility in specifying models

503 compared with similar implementations (*e.g.*, BMM only allows an exponential prior distribution with a fixed  
504 mean parameter for the speciation and extinction rate).

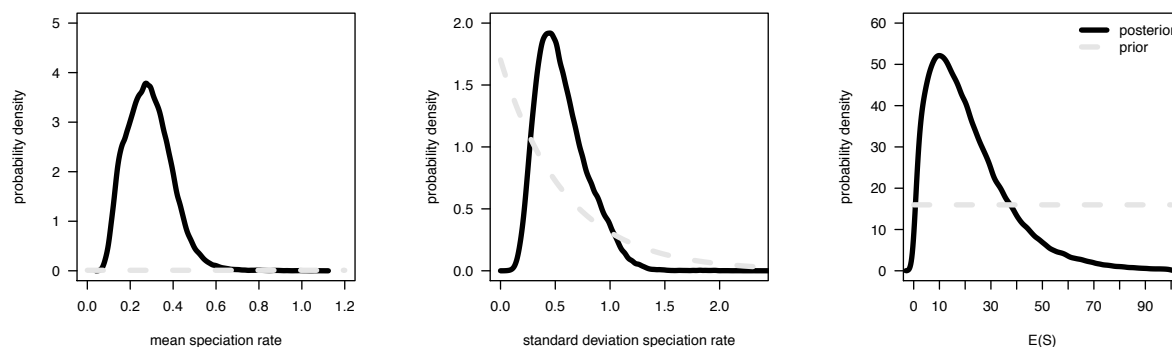

**Figure 15: Estimation of hyperparameters under the hierarchical lineage-specific birth-death-shift model.** We estimated the mean ( $m_\lambda$ ) and standard deviation ( $sd_\lambda$ ) of the lognormal base distribution for the speciation rate (left and middle panels). Additionally, we estimated the shift-rate  $\eta$  (right panel; showing the expected number of shifts,  $E(S)$ , for an intuitive interpretation). We used the following prior distributions:  $m_\lambda \sim \text{Unif}(0, 100)$ ,  $sd_\lambda \sim \text{Exp}(1.0/0.587405)$ , and  $E(S) \sim \text{Unif}(0, 100)$ . The posterior distributions (black solid lines) show clear deviations from the corresponding prior distributions (light-gray dashed lines).

505 As a demonstration, we analyzed the primates phylogeny using a hierarchical model for the lognormal  
506 base distribution of the diversification rates. We assumed a uniform prior distribution between 0 and 100 for  
507 the mean of the lognormal base distribution and an exponential prior distribution with a mean of 0.587405  
508 (we expect that 95% of the lognormal base distribution spans one order of magnitude; Höhna et al. 2017).  
509 Our example analysis shows that the hyperprior parameters of the base distribution can indeed be estimated  
510 (Figure 15). That is, the phylogeny appears to have sufficient information about the mean and variation  
511 branch-specific speciation rates. The hyperparameter estimates are not driven by their choices of prior  
512 distributions. Furthermore, the hierarchical approach reduces the prior sensitivity. Thus, we recommend to  
513 use such a hierarchical model for empirical analyses because it is difficult, if not impossible, to know which  
514 mean and standard deviation to assume for the base distribution of the diversification rates.

515 *Prior Sensitivity and Estimating the Number of Rate Shifts*— Our analyses have shown that the estimated  
516 number of diversification-rate shifts is very sensitive to the assumed prior distribution on the shift-rate  
517 (Figure 12). This prior sensitivity is actually expected because many small diversification-rate changes can  
518 have a similar effect as few large diversification-rate changes (Huelsenbeck et al. 2000). Our results do  
519 not imply that the shift-rate (and the number of diversification-rate shifts) is not identifiable. Specifically,  
520 Figure 12 shows that there is a (weak) signal for at least one diversification-rate shift but fewer than 20.

521 In practice, a biologist might have a good idea what number of diversification-rate shifts to expect for a  
522 given study group. However, we caution researchers to over-interpret the estimated number of diversification-  
523 rate shifts. We emphasize that in every empirical analysis either a set of prior assumptions should be applied  
524 (*e.g.*, by setting the number of *a priori* expected diversification-rate shifts to 1, 10 and 20), or a hyperprior  
525 distribution on the shift-rate  $\eta$  should be used. In our primate example analysis we observe that there is  
526 some signal for the shift-rate  $\eta$  (Figure 15; right panel). Moreover, the hyperprior analysis (Figure 15; right



527 panel) confirms the results about the expected number of diversification-rate shifts of the fixed-prior analyses  
528 (Figure 12).

### 529 *Future directions and applications*

530 In the present study we have focused on estimating branch-specific diversification rates. Nevertheless, our  
531 lineage-specific birth-death-shift model can be extended and applied in several different ways. Here we  
532 provide some thoughts to stimulate further ideas and research.

533 *Correlation of diversification rates to other model components*— We can extend the lineage-specific birth-  
534 death-shift model to analyses where other parts of the model (*e.g.*, rates of molecular or morphological  
535 evolution) are correlated with the speciation and extinction rates. Let us consider as an example an analysis  
536 where the rates of speciation correlate with the rate of molecular evolution by  $\tilde{r}_i = \alpha \times \tilde{\lambda}_i$  where  $\tilde{r}_i$  is the  
537 average rate of molecular evolution on branch  $i$  and  $\tilde{\lambda}_i$  is the average rate of speciation on branch  $i$ . Then,  
538 we compute the average rate of speciation per branch  $\tilde{\lambda}_i$  and deterministically transform these average  
539 speciation rates into average rates of molecular evolution  $\tilde{r}_i$ . Thus, for this type of analyses we have to  
540 use the data-augmentation method because it adds the diversification-rate shifts onto the phylogeny. In  
541 such a situation, the rates of molecular evolution also have an impact on the number, location/timing and  
542 magnitude of the diversification-rate shifts. It is the joint posterior probability of the diversification-rate  
543 shifts, the speciation and extinction rates, and the rates of molecular evolution that we will estimate. Since  
544 the stochastic character mapping draws the diversification-rate shifts only from the lineage-specific birth-  
545 death-shift process without any information about other parts of the model depending on these events and  
546 rates, the stochastic character mapping method is not applicable in these types of analyses. However, the  
547 stochastic character mapping can be used as a proposal distribution in the MCMC algorithm. In *RevBayes*,  
548 such applications to linked models are readily available.

549 *Cladogenetic and anagenetic diversification-rate shifts*— The lineage-specific birth-death-shift process de-  
550 scribed here permits for shifts in speciation and extinction rates along the branches of a phylogeny (*i.e.*,  
551 anagenetic diversification rate shifts). However, many biological explanations for diversification-rate shifts  
552 have been hypothesized to correspond with speciation events (*i.e.*, cladogenetic diversification-rate shifts).  
553 Diversification-rate shifts have been modeled as occurring simultaneously with, for example, allopatric spe-  
554 ciation events (Goldberg et al. 2011), cladogenetic changes in life history traits such as breeding system  
555 (Goldberg and Igić 2012), and cladogenetic changes in chromosome number or ploidy (Freyman and Höhna  
556 2019). In contrast to those models, the lineage-specific birth-death-shift process tests for diversification rate  
557 shifts unassociated with an observed character. However, a biologist may want to use the lineage-specific  
558 birth-death-shift process to explore the possibility of diversification-rate shifts occurring at speciation events.  
559 Our stochastic character mapping approach for the lineage-specific birth-death-shift process is described pri-  
560 marily by Equations 3, 4, and 6, which represent a special case of the backward- and forward-time ODEs in

561 Freyman and Höhna (2019) that enable both anagenetic and cladogenetic diversification-rate shifts. These  
562 general equations are implemented in **RevBayes** and could be used along with our approach discretizing  
563 the speciation- and extinction-rate base probability distributions into  $k$  categories to test a lineage-specific  
564 birth-death-shift process with both cladogenetic and anagenetic diversification-rate shifts. We mention this  
565 aspect of our implementation to highlight its flexibility for testing different diversification scenarios, however,  
566 we leave further exploration of cladogenetic diversification rate shifts to future work.

567 *The lineage-specific birth-death-shift process as a prior distribution on divergence times*— The primary goal  
568 of our development of the lineage-specific birth-death-shift process was to estimate branch-specific speciation  
569 and extinction rates. However, in **RevBayes** one can use the lineage-specific birth-death-shift process as a  
570 prior distribution on the phylogeny, *i.e.*, divergence times and tree topology. Recent studies have shown the  
571 impact of prior distributions on divergence times, although the overall importance is not fully understood  
572 (Condamine et al. 2015; Foster et al. 2016; Donoghue and Yang 2016). Allowing for rate variation among  
573 lineages is likely a more biologically realistic model and thus should be preferred. Using our lineage-specific  
574 birth-death-shift process in **RevBayes** it is now possible to estimate divergence time using this biologically  
575 more realistic model.

576 If the purpose of such an analysis is only to estimate the phylogeny and divergence times, then the  
577 lineage-specific birth-death-shift implementation integrating over all rate categories should be preferred (the  
578 stochastic character mapping step can be omitted). If instead the goal of the analysis is to estimate branch-  
579 specific speciation and extinction rates, as well as the phylogeny and divergence times, then the stochastic  
580 character mapping method should be used. The data-augmentation method has the fundamental problem  
581 that changes in the tree topology could consequently lead to changes in the the assignment of branches to  
582 rate categories. This problem also occurs if we would take phylogenetic uncertainty into account by using a  
583 sample of phylogenies from the posterior distribution (also available in **RevBayes**).

584 A major open issue is how to summarize branch-specific speciation and extinction rates for different  
585 phylogenies. Specifically, branches may have a different meaning for different phylogenies. More research is  
586 needed on how to interpret diversification-rate changes for different phylogenies.

## 587 CONCLUSIONS

588 In the present paper we have introduced the lineage-specific birth-death-shift process, a stochastic branch-  
589 ing process to model diversification rate variation among lineages. We described two different methods  
590 for estimating branch-specific speciation and extinction rates: data-augmentation and stochastic character  
591 mapping. We presented a validation of our implementation of the two methods in **RevBayes** and discussed  
592 potential applications and pitfalls. Most importantly, we provide researchers with a consistent model and  
593 correct implementation for estimating branch-specific speciation and extinction rates.

## ACKNOWLEDGEMENTS

594

595 This research was supported by the Deutsche Forschungsgemeinschaft (DFG) Emmy Noether-Program  
596 HO 6201/1-1 awarded to SH, and National Science Foundation (NSF) grants DEB-0842181, DEB-0919529,  
597 DBI-1356737, and DEB-1457835 awarded to BRM, and by DEB-1759909 awarded to JPH, and also by  
598 DEB-1655478 awarded to WAF.

## REFERENCES

599

- 600 Alfaro, M., F. Santini, C. Brock, H. Alamillo, A. Dornburg, D. Rabosky, G. Carnevale, and L. Harmon. 2009.  
601 Nine exceptional radiations plus high turnover explain species diversity in jawed vertebrates. *Proceedings*  
602 *of the National Academy of Sciences* 106:13410–13414.
- 603 Barido-Sottani, J., T. G. Vaughan, and T. Stadler. 2018. A Multi-State Birth-Death model for Bayesian  
604 inference of lineage-specific birth and death rates. *bioRxiv* .
- 605 Beaulieu, J. M. and B. C. O’Meara. 2016. Detecting hidden diversification shifts in models of trait-dependent  
606 speciation and extinction. *Systematic Biology* 65:583–601.
- 607 Chan, K. M. A. and B. R. Moore. 2005. SymmeTREE: whole-tree analysis of differential diversification rates.  
608 *Bioinformatics* 21:1709–1710.
- 609 Condamine, F. L., N. S. Nagalingum, C. R. Marshall, and H. Morlon. 2015. Origin and diversification of  
610 living cycads: a cautionary tale on the impact of the branching process prior in bayesian molecular dating.  
611 *BMC Evolutionary Biology* 15:65.
- 612 Condamine, F. L., J. Rolland, S. Höhna, F. A. H. Sperling, and I. Sanmartín. 2018. Testing the role of the  
613 Red Queen and Court Jester as drivers of the macroevolution of Apollo butterflies. *Systematic Biology*  
614 67:940–964.
- 615 Condamine, F. L., J. Rolland, and H. Morlon. 2013. Macroevolutionary perspectives to environmental change.  
616 *Ecology Letters* 16:72–85.
- 617 Dempster, A. P., N. M. Laird, D. B. Rubin, et al. 1977. Maximum likelihood from incomplete data via the  
618 EM algorithm. *Journal of the Royal Statistical Society. Series B (Methodological)* 39:1–38.
- 619 Donoghue, P. C. and Z. Yang. 2016. The evolution of methods for establishing evolutionary timescales. *Phil.*  
620 *Trans. R. Soc. B* 371:20160020.
- 621 Etienne, R. and B. Haegeman. 2012. A Conceptual and Statistical Framework for Adaptive Radiations with  
622 a Key Role for Diversity Dependence. *The American Naturalist* 180:75–89.
- 623 FitzJohn, R., W. Maddison, and S. Otto. 2009. Estimating trait-dependent speciation and extinction rates  
624 from incompletely resolved phylogenies. *Systematic Biology* 58:595–611.

- 625 FitzJohn, R. G. 2010. Quantitative traits and diversification. *Systematic Biology* 59:619–633.
- 626 FitzJohn, R. G. 2012. Diversitree: comparative phylogenetic analyses of diversification in R. *Methods in*  
627 *Ecology and Evolution* 3:1084–1092.
- 628 Foster, C. S., H. Sauquet, M. Van der Merwe, H. McPherson, M. Rossetto, and S. Y. Ho. 2016. Evaluating  
629 the impact of genomic data and priors on bayesian estimates of the angiosperm evolutionary timescale.  
630 *Systematic Biology* 66:338–351.
- 631 Freyman, W. A. and S. Höhna. 2018. Cladogenetic and anagenetic models of chromosome number evolution:  
632 a Bayesian model averaging approach. *Systematic Biology* 67:195–215.
- 633 Freyman, W. A. and S. Höhna. 2019. Stochastic character mapping of state-dependent diversification reveals  
634 the tempo of evolutionary decline in self-compatible Onagraceae lineages. *Systematic Biology* .
- 635 Gelfand, A. E. and A. F. M. Smith. 1990. Sampling-Based Approaches to Calculating Marginal Densities.  
636 *Journal of the American Statistical Association* 85:398–409.
- 637 Goldberg, E. E. and B. Igić. 2012. Tempo and mode in plant breeding system evolution. *Evolution: Inter-*  
638 *national Journal of Organic Evolution* 66:3701–3709.
- 639 Goldberg, E. E., L. T. Lancaster, and R. H. Ree. 2011. Phylogenetic inference of reciprocal effects between  
640 geographic range evolution and diversification. *Systematic Biology* 60:451–465.
- 641 Höhna, S. 2014. Likelihood Inference of Non-Constant Diversification Rates with Incomplete Taxon Sampling.  
642 *PLoS One* 9:e84184.
- 643 Höhna, S. 2015. The time-dependent reconstructed evolutionary process with a key-role for mass-extinction  
644 events. *Journal of Theoretical Biology* 380:321–331.
- 645 Höhna, S., M. Landis, and T. Heath. 2017. Phylogenetic inference using revbayes. *Current protocols in*  
646 *bioinformatics* 57:6–16.
- 647 Höhna, S., M. J. Landis, T. A. Heath, B. Boussau, N. Lartillot, B. R. Moore, J. P. Huelsenbeck, and  
648 F. Ronquist. 2016. RevBayes: Bayesian phylogenetic inference using graphical models and an interactive  
649 model-specification language. *Systematic Biology* 65:726–736.
- 650 Huelsenbeck, J., F. Ronquist, R. Nielsen, and J. Bollback. 2001. Bayesian Inference of Phylogeny and Its  
651 Impact on Evolutionary Biology. *Science* 294:2310 – 2314.
- 652 Huelsenbeck, J. P., B. Larget, and D. L. Swofford. 2000. A compound Poisson process for relaxing the  
653 molecular clock. *Genetics* 154:1879–1892.
- 654 Huelsenbeck, J. P. and B. Rannala. 2004. Frequentist Properties of Bayesian Posterior Probabilities of Phy-  
655 logenetic Trees Under Simple and Complex Substitution Models. *Systematic Biology* 53:904–913.

- 656 Hutchinson, G. E. 1959. Homage to santa rosalia or why are there so many kinds of animals? *The American*  
657 *Naturalist* 93:145–159.
- 658 Kendall, D. G. 1948. On the generalized "birth-and-death" process. *The Annals of Mathematical Statistics*  
659 19:1–15.
- 660 Landis, M. J., W. A. Freyman, and B. G. Baldwin. 2018. Retracing the hawaiian silversword radiation  
661 despite phylogenetic, biogeographic, and paleogeographic uncertainty. *Evolution* 72:2343–2359.
- 662 Landis, M. J., N. J. Matzke, B. R. Moore, and J. P. Huelsenbeck. 2013. Bayesian analysis of biogeography  
663 when the number of areas is large. *Systematic Biology* 62:789–804.
- 664 Maddison, W., P. Midford, and S. Otto. 2007. Estimating a binary character's effect on speciation and  
665 extinction. *Systematic Biology* 56:701.
- 666 Magnuson-Ford, K. and S. P. Otto. 2012. Linking the investigations of character evolution and species  
667 diversification. *The American Naturalist* 180:225–245.
- 668 May, M. R., S. Höhna, and B. R. Moore. 2016. A Bayesian Approach for Detecting the Impact of Mass-  
669 Extinction Events on Molecular Phylogenies When Rates of Lineage Diversification May Vary. *Methods*  
670 *in Ecology and Evolution* 7:947–959.
- 671 May, M. R. and B. R. Moore. 2016. How Well Can We Detect Lineage-Specific Diversification-Rate Shifts?  
672 A Simulation Study of Sequential AIC Methods. *Systematic Biology* 65:1076–1084.
- 673 Meyer, A. L. S., C. Román-Palacios, and J. J. Wiens. 2018. BAMM gives misleading rate estimates in  
674 simulated and empirical datasets. *Evolution* .
- 675 Meyer, A. L. S. and J. J. Wiens. 2018. Estimating diversification rates for higher taxa: BAMM can give  
676 problematic estimates of rates and rate shifts. *Evolution* 72:39–53.
- 677 Moore, B. R., K. M. Chan, and M. J. Donoghue. 2004. Phylogenetic Supertrees chap. Detecting diversification  
678 rate variation in supertrees, Pages 487–533. Springer.
- 679 Moore, B. R., S. Höhna, M. R. May, B. Rannala, and J. P. Huelsenbeck. 2016. Critically evaluating the  
680 theory and performance of Bayesian analysis of macroevolutionary mixtures. *Proceedings of the National*  
681 *Academy of Sciences* 113:9569–9574.
- 682 Morlon, H. 2014. Phylogenetic approaches for studying diversification. *Ecology letters* 17:508–525.
- 683 Morlon, H., T. Parsons, and J. Plotkin. 2011. Reconciling molecular phylogenies with the fossil record.  
684 *Proceedings of the National Academy of Sciences* 108:16327–16332.
- 685 Nee, S., E. Holmes, R. May, and P. Harvey. 1994a. Extinction rates can be estimated from molecular  
686 phylogenies. *Philosophical Transactions: Biological Sciences* 344:77–82.

- 687 Nee, S., R. M. May, and P. H. Harvey. 1994b. The Reconstructed Evolutionary Process. *Philosophical*  
688 *Transactions: Biological Sciences* 344:305–311.
- 689 Nielsen, R. 2002. Mapping mutations on phylogenies. *Systematic Biology* 51:729–739.
- 690 Rabosky, D. L. 2014. Automatic detection of key innovations, rate shifts, and diversity-dependence on  
691 phylogenetic trees. *PLoS One* 9:e89543.
- 692 Rabosky, D. L. 2018. BAMM at the court of false equivalency: a response to Meyer and Wiens. *Evolution* .
- 693 Rabosky, D. L., J. S. Mitchell, and J. Chang. 2017. Is bamm flawed? theoretical and practical concerns in  
694 the analysis of multi-rate diversification models. *Systematic Biology* 66:477–498.
- 695 Springer, M. S., R. W. Meredith, J. Gatesy, C. A. Emerling, J. Park, D. L. Rabosky, T. Stadler, C. Steiner,  
696 O. A. Ryder, J. E. Janečka, et al. 2012. Macroevolutionary dynamics and historical biogeography of  
697 primate diversification inferred from a species supermatrix. *PloS one* 7:e49521.
- 698 Stadler, T. 2011. Mammalian phylogeny reveals recent diversification rate shifts. *Proceedings of the National*  
699 *Academy of Sciences* 108:6187–6192.
- 700 Tanner, M. A. and W. H. Wong. 1987. The calculation of posterior distributions by data augmentation.  
701 *Journal of the American Statistical Association* 82:528–540.
- 702 Uyeda, J. C. and L. J. Harmon. 2014. A novel Bayesian method for inferring and interpreting the dynamics  
703 of adaptive landscapes from phylogenetic comparative data. *Systematic biology* 63:902–918.
- 704 Yang, Z. 1994. Maximum likelihood phylogenetic estimation from DNA sequences with variable rates over  
705 sites: approximate methods. *Journal of Molecular Evolution* 39:306–314.
